# Supplementary material
Source: ML conference proceedings conference paper supplement (https://proceedings.neurips.cc/paper_files/paper/2013/hash/a7d8ae4569120b5bec12e7b6e9648b86-Abstract.html)
Supplement: Supplementary file [file a7d8ae4569120b5bec12e7b6e9648b86-Supplemental.zip]

---

# Supplementary Material

## Auxiliary-variable Exact Hamiltonian Monte Carlo Samplers for Binary Distributions

---

Ari Pakman and Liam Paninski  
 Department of Statistics  
 Center for Theoretical Neuroscience  
 Grossman Center for the Statistics of Mind  
 Columbia University  
 New York, NY, 10027

### 1 Wall-crossing rate in the Gaussian augmentation

In the Gaussian augmentation, the equilibrium distribution of  $(\mathbf{y}, \mathbf{q})$  in each orthant is

$$p(\mathbf{y}, \mathbf{q} | \mathbf{s}) \propto e^{-\frac{\mathbf{y} \cdot \mathbf{y}}{2}} e^{-\frac{\mathbf{q} \cdot \mathbf{q}}{2}}, \quad (1)$$

and therefore the distribution of

$$u_i = y_i^2 + q_i^2 \quad i = 1, \dots, d. \quad (2)$$

is  $\chi_2^2$ , chi-squared with two degrees of freedom. Due to conservation of energy, each  $u_i$  is constant while the particle stays in an orthant and only changes if it crosses the  $y_i = 0$  wall. When the particle hits the  $y_i = 0$  wall, we have  $u_i = q_i^2(t_i^-)$ , and the particle crosses if

$$u_i > -2 \log p(-s_i, \mathbf{s}_{-i}) + 2 \log p(s_i, \mathbf{s}_{-i}). \quad (3)$$

The probability of this event is

$$P \left[ u_i > -2 \log \left( \frac{p(-s_i, \mathbf{s}_{-i})}{p(s_i, \mathbf{s}_{-i})} \right) \right] = \begin{cases} 1 & \text{for } \frac{p(-s_i, \mathbf{s}_{-i})}{p(s_i, \mathbf{s}_{-i})} > 1 \\ 1 - C_{\chi_2^2}(-2 \log \left( \frac{p(-s_i, \mathbf{s}_{-i})}{p(s_i, \mathbf{s}_{-i})} \right)) & \text{for } \frac{p(-s_i, \mathbf{s}_{-i})}{p(s_i, \mathbf{s}_{-i})} < 1 \end{cases} \quad (4)$$

where

$$C_{\chi_2^2}(x) = 1 - e^{-\frac{x}{2}} \quad (5)$$

is the cdf of  $\chi_2^2$ . Inserting this expression in (4) gives

$$P \left[ u_i > -2 \log \left( \frac{p(-s_i, \mathbf{s}_{-i})}{p(s_i, \mathbf{s}_{-i})} \right) \right] = \min \left( 1, \frac{p(-s_i, \mathbf{s}_{-i})}{p(s_i, \mathbf{s}_{-i})} \right) \quad (6)$$

which is exactly the probability of acceptance in a Metropolis algorithm that samples uniformly a value for  $i$  and makes a proposal of flipping the binary variable  $s_i$ .

### 2 Comparing the efficiency of binary samplers

We performed a more detailed comparison of the efficiency of the binary HMC sampler with Gaussian and exponential augmentations and the Metropolis sampler. As in Section 4.1, we considered a 1D Ising model with  $d = 400$  and  $\beta = 0.42$ . The results are in Figure 1 and show that the HMC sampler with Gaussian augmentation is the most efficient of the three samplers.

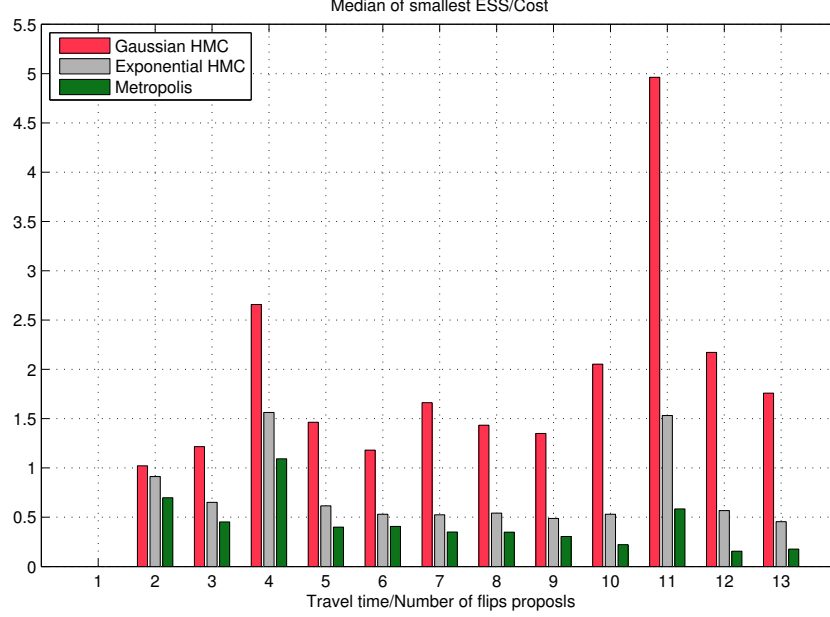

Figure 1: **Efficiency comparison for binary samplers.** We considered a 1D Ising model with  $d = 400$  and  $\beta = 0.42$ . In the Gaussian HMC sampler we considered  $T = (n - 1/2)\pi$  with  $n = 1, \dots, 13$ , for Metropolis we recorded the state of the chain after  $d \times (n - 1/2)$  flip proposals and for the exponential HMC case we used  $T$ 's corresponding to similar computational costs. For each  $n$  and each sampler we took 3000 samples and recorded the smallest effective sample size (ESS) among the 400 estimators  $\langle s_i \rangle$ . We repeated this 10 times and computed the median value of these smallest ESSs. The plot shows these values divided by the computational cost for each  $n$ . Note that the HMC Gaussian sampler is consistently more efficient.

### 3 Details of spike-and-slab linear regression with truncated parameters

We want to sample from the distribution

$$p(\mathbf{w}, \mathbf{y} | D, a, \tau^2) \propto e^{-\frac{1}{2} \mathbf{w}'_+ (\mathbf{M}_+ + \tau^{-2}) \mathbf{w}_+ + \mathbf{r}_+ \cdot \mathbf{w}_+} e^{-\frac{\mathbf{w}_- \cdot \mathbf{w}_-}{2\tau^2}} e^{-\frac{\mathbf{y} \cdot \mathbf{y}}{2} a^{|\mathbf{s}^+|} (1-a)^{|\mathbf{s}^-|}} \quad (7)$$

where the values of  $\mathbf{s}$  in the rhs are obtained from the signs of  $\mathbf{y}$ . Since (7) is a piecewise Gaussian distribution, we can sample from it using the methods of [1]. For this, we introduce momentum variables  $q_i$  and  $g_i$  associated to the coordinates  $y_i$  and  $w_i$  and consider the Hamiltonian

$$H = H_{\mathbf{y}, \mathbf{q}} + H_{\mathbf{w}, \mathbf{g}} - |\mathbf{s}^+| \log a - |\mathbf{s}^-| \log(1-a) \quad (8)$$

$$H_{\mathbf{y}, \mathbf{q}} = \frac{\mathbf{y} \cdot \mathbf{y}}{2} + \frac{\mathbf{q} \cdot \mathbf{q}}{2} \quad (9)$$

$$H_{\mathbf{w}, \mathbf{g}} = \frac{\mathbf{w}'_+ \Sigma_+^{-1} \mathbf{w}_+}{2} - \mathbf{r}_+ \cdot \mathbf{w}_+ + \frac{\mathbf{g}'_+ \Sigma_+ \mathbf{g}_+}{2} + \frac{\mathbf{w}_- \cdot \mathbf{w}_-}{2\tau^2} + \frac{\mathbf{g}_- \cdot \mathbf{g}_-}{2\tau^{-2}} \quad (10)$$

where we defined

$$\Sigma_+ = (\mathbf{M}_+ + \tau^{-2})^{-1}. \quad (11)$$

Note that we have chosen a mass matrix for  $\mathbf{g}$  that depends on the orthant of  $\mathbf{y}$ , much like the potential terms for  $\mathbf{w}$ . This choice leads to decoupled equations of motion for all the coordinates, with solutions

$$y_i(t) = y_i(0) \cos(t) + q_i(0) \sin(t), \quad (12)$$

$$w_i(t) = \mu_i + (w_i(0) - \mu_i) \cos(t) + \dot{w}_i(0) \sin(t), \quad (13)$$

where in each orthant the components of  $\boldsymbol{\mu}$  are

$$\boldsymbol{\mu}_- = \mathbf{0}, \quad (14)$$

$$\boldsymbol{\mu}_+ = \Sigma_+ \mathbf{r}_+. \quad (15)$$

Each iteration of the sampling algorithm consists of sampling initial values for  $\mathbf{q}$  and  $\dot{\mathbf{w}}$  from

$$q_i(0) \sim \mathcal{N}(0, 1), \quad (16)$$

$$\dot{w}_i(0) \sim \mathcal{N}(0, \tau^2) \quad \text{for } s_i = -1, \quad (17)$$

$$\dot{\mathbf{w}}_+(0) \sim \mathcal{N}(0, \Sigma_+), \quad (18)$$

and letting the particle move during a time  $T$  according to the Hamiltonian (8). As before, the final coordinates belong to a Markov chain with invariant distribution  $p(\mathbf{w}, \mathbf{y} | D, a\tau^2)$ , and are used as the initial coordinates of the next iteration. Note that it is more convenient to sample  $\dot{\mathbf{w}}$  instead of  $\mathbf{g}$  (related by  $\dot{\mathbf{w}}_+ = \Sigma_+ \mathbf{g}_+$ ,  $\dot{\mathbf{w}}_- = \tau^2 \mathbf{g}_-$ ), because it is the former that appears in (13).

The trajectory of the particle in the  $(\mathbf{y}, \mathbf{w})$ -space is given by (12)-(13) until some coordinate  $y_j$  reaches  $y_j = 0$  at time  $t_j$ , or, if the space of  $\mathbf{w}$  is truncated, the  $\mathbf{w}$  coordinates touch the boundary of their allowed space. Consider the first case and suppose that  $y_j < 0$  for  $t < t_j$ . The conservation of energy across the  $y_j = 0$  boundary implies

$$\frac{q_j^2(t_j^+)}{2} = \Delta_j + \frac{q_j^2(t_j^-)}{2}, \quad (19)$$

and the energy jump  $\Delta_j$  depends on  $\mathbf{w}$  and  $\mathbf{g}$  and is given by

$$\Delta_j = -H_{\mathbf{w}, \mathbf{g}}(\mathbf{s}_{-j}, s_j = +1) + H_{\mathbf{w}, \mathbf{g}}(\mathbf{s}_{-j}, s_j = -1) + \log(a/(1-a)). \quad (20)$$

Note that the trajectory of  $\mathbf{w}$ ,  $\mathbf{g}$  is continuous at  $t = t_j$ , and (20) only refers to the change in the functional form of  $H$  across the boundary. If (19) gives a positive value for  $q_j^2(t_j^+)$ , the particle crosses the  $y_j = 0$  boundary, and if not, it bounces back with  $q_j(t_j^+) = -q_j(t_j^-)$ . In the  $\mathbf{w}$ -truncated case, when the  $\mathbf{w}$  coordinates touch the boundary of their allowed space, the velocity  $\dot{\mathbf{w}}$  is reflected off the boundary in an elastic collision, similarly to the truncated Gaussians discussed in [1].

## References

- [1] Ari Pakman and Liam Paninski. Exact Hamiltonian Monte Carlo for Truncated Multivariate Gaussians. *Journal of Computational and Graphical Statistics*, 2013, arXiv:1208.4118.
